1  
2  
3  
4  
5  
6  
7  
8  
9  
10  
11  
12  
13  
14  
15  
16  
17  
18  
19  
20

## A Mobile Intervention to Reduce Anxiety Among University Students, Faculty, and Staff: Mixed Methods Study on Users' Experiences

Sarah Livermon<sup>1\*</sup>, Audrey Michel<sup>2¶</sup>, Yiyang Zhang<sup>2¶</sup>, Kaitlyn Petz<sup>2</sup>, Emma Toner<sup>2</sup>, Mark Rucker<sup>1</sup>,  
Mehdi Boukhechba<sup>1</sup>, Laura E. Barnes<sup>1</sup>, and Bethany A. Teachman<sup>2\*</sup>

<sup>1</sup>Department of Systems and Information Engineering, University of Virginia, Charlottesville,  
United States of America

<sup>2</sup>Department of Psychology, University of Virginia, Charlottesville, Virginia, United States of  
America

\* Corresponding author

E-mail: [sat2ew@virginia.edu](mailto:sat2ew@virginia.edu) (SL)

E-mail: [bteachman@virginia.edu](mailto:bteachman@virginia.edu) (BAT)

¶These authors contributed equally to this work.

## 21 **Abstract**

22 Anxiety is highly prevalent among college communities, with significant numbers of students,  
23 faculty, and staff experiencing severe anxiety symptoms. Despite this high prevalence, many  
24 individuals remain untreated due to barriers such as time, stigma, waitlists, and cost of services.  
25 Digital mental health interventions (DMHIs), including Cognitive Bias Modification for  
26 Interpretation (CBM-I), offer promising solutions to enhance access to mental health care, yet  
27 there is a critical need to evaluate user experience and acceptability of DMHIs. This study used  
28 a mixed methods approach to gather feedback from users of the first trial of a mobile application  
29 called "Hoos Think Calmly" (HTC), which offers brief CBM-I training to reduce negative  
30 interpretations and increase flexible thinking in response to stressors commonly experienced by  
31 students, faculty, and staff at a large public university. Following the parent trial  
32 (<https://osf.io/36grh/>) qualitative data was collected through semi-structured interviews from a  
33 subset of participants (n=22). Thematic analysis revealed five main themes: Effectiveness of the  
34 Training Program; Feedback on Training Sessions; Barriers to Using the App; Use Patterns;  
35 and Suggestions for Improvement. Feedback highlighted the importance of greater content  
36 relatability and personalization, while also identifying forgetfulness and not understanding the  
37 intervention format or rationale as barriers to using the program. Participants tended to use the  
38 program at routine or scheduled times rather than during specific moments of stress or anxiety  
39 and relied heavily on the app's notification system. Suggestions for improvement focused on  
40 incorporating progress tracking, offering greater customization options, and integrating more  
41 diverse training content. Additionally, biweekly user experience questionnaires sent to all  
42 participants in the active treatment condition (n=134) during the parent trial showed most  
43 participants reported the program to be slightly to somewhat helpful in reducing or managing  
44 their anxiety or stress. Findings highlight the importance of understanding users' experience and  
45 iterative DMHI development.

## 46 **Author Summary**

47 Effective digital mental health interventions can help address the high levels of reported anxiety  
48 in college communities. These interventions can be used to reduce the barriers to accessing  
49 mental health services and promote flexible thinking to reduce the harmful impacts of anxiety.  
50 Despite evidence supporting the effectiveness of various DMHIs, their impact is often hindered  
51 by high attrition rates alongside low engagement. In this study, we gathered mixed-methods  
52 feedback data on a new DMHI called Hoos Think Calmly to assess individual user experiences  
53 that may impact engagement. Our goal is to better understand participants' evaluation of HTC  
54 and to gather feedback on how to enhance acceptability of the program in future iterations. Data  
55 was collected through feedback interviews and user experience questionnaires. We found that  
56 participants perceived HTC to be somewhat effective at reducing or managing their anxiety, but  
57 also noted barriers to ongoing use. Our study provides helpful insights into app use patterns,  
58 barriers to engagement, and general suggestions for improving DMHIs.

## 59 **Introduction**

### 60 **Background**

61 Anxiety disorders are highly prevalent among college communities. A 2023 study indicated that  
62 41.8% of college students and 38.6% of faculty and staff had experienced symptoms consistent  
63 with severe or extremely severe anxiety over the past week [1]. Despite these alarmingly high  
64 rates, many individuals in need of mental health services remain untreated [2]. Some of the  
65 most common barriers to receiving mental health services among college students are access,  
66 time, and stigma. Accessibility barriers specifically include lengthy wait times, the cost of  
67 services, and perceived lack of options [3,4]. Similarly, university faculty reported stigma and  
68 lack of support as their main barriers to receiving mental health care [5].

69 In light of these barriers, there has been increased interest in digital mental health interventions  
70 (DMHIs). DMHIs provide mental health support via technologies like web-based or mobile

71 platforms and have the potential to expand treatment delivery options and enhance access to  
72 mental health care [6]. Studies show DMHIs may be particularly effective at reducing  
73 depression, anxiety, and stress outcomes in academic settings [7,8].  
74 The use of Cognitive Bias Modification for Interpretation (CBM-I) is a mechanistic intervention  
75 that may be an effective component of treatment for anxiety [9-11], given extensive research  
76 showing that selective threat interpretations are common among individuals high in anxiety [12].  
77 CBM-I is a type of training designed to modify threat-focused cognitive biases related to  
78 interpretation processes (i.e., assigning threatening meanings to ambiguous situations). CBM-I  
79 training typically involves presenting participants with ambiguous scenarios or stimuli and  
80 encouraging them to interpret them in a more positive or benign manner. Through repeated  
81 practice and reinforcement, the aim is to help individuals develop more flexible patterns of  
82 interpretation that are not so rigidly negative, which is expected to then reduce anxiety.  
83 Although there is evidence supporting the effectiveness of various DMHIs, such as online CBM-I  
84 training (including at our team's MindTrails website; [13-15]), their impact is hindered by high  
85 attrition rates alongside low engagement [16-18]. Better ways to overcome these common  
86 limitations of DMHIs need to be better understood. A 2021 review found that participants'  
87 engagement with DMHIs increased when users found the content appealing, perceived the  
88 program to be a good fit, and experienced perceived changes in their mental health [19]. Thus,  
89 we need to understand what makes content appealing and a good fit to users. Research on  
90 DMHIs tends to rely on quantitative metrics to evaluate outcomes, which are very valuable but  
91 limited in their ability to contextualize data and assess individual user experiences that may  
92 impact engagement. This points to the value of also using qualitative approaches to help  
93 design, evaluate and improve DMHIs [20-22]. For instance, qualitative methods can be used  
94 during the post-trial phase of pilot studies to gain insight into users' acceptance of and feedback  
95 on DMHIs [23]. This feedback can be especially valuable to guide improvements for future  
96 versions of a DMHI.

## 97 **Objective**

98 The objective of this study is to collect feedback from participants in the first trial of a mobile  
99 application called “Hoos Think Calmly” (HTC) to evaluate acceptability and gain a deeper  
100 understanding of their experiences and suggestions for improvement. HTC is designed to  
101 increase flexible thinking in response to stressors commonly experienced by students, faculty,  
102 and staff at a large public university through brief ~5 minute interventions (microdoses) of CBM-I  
103 training delivered by mobile phone to university community members. Study design and  
104 analysis plans were preregistered on Open Science Framework [24].

## 105 **Methods**

### 106 **Ethics approval and consent to participate**

107 This study was approved by the Institutional Review Board for Social and Behavioral Sciences  
108 (IRB-SBS) at the University of Virginia. All participants provided written informed consent via an  
109 electronic consent form prior to enrollment and participation.

### 110 **Strategies to understand and mitigate bias: Reflexivity and credibility**

111 Our team acknowledges that we bring biases in favor of HTC, having grants that fund the  
112 program and prior tests of the parent program MindTrails that demonstrated efficacy in reducing  
113 anxiety [13-15]. It is likely that these factors may predispose us towards interpreting the current  
114 findings more positively.

115 To bolster methodological integrity, we employed several credibility strategies. Two of the initial  
116 coders on the research team were individuals not involved in the data collection process to help  
117 mitigate biases and allow for fresh perspectives [25]. Likewise, we established an intercoder  
118 reliability score exceeding 0.80 on a subset of interviews before proceeding with general coding  
119 to increase coding consistency. Throughout the analysis, the lead author attended a recurring  
120 journal club focused on best practices in qualitative research. During this time, the lead author  
121 also spent time examining personal judgements and beliefs to better understand how biases

122 might influence the research process and outcomes. We encouraged peer examination, and  
123 colleagues were asked to give feedback on our research methodology and procedures. An audit  
124 trail was kept of all edits made to the codebook throughout the analysis process to help  
125 establish confirmability and trustworthiness of data [see 26]. This study was reported using the  
126 Standards for Reporting Qualitative Research (SRQR) guidelines [27] (S1 Text).

## 127 **Intervention**

128 In the parent randomized control trial (RCT), n=134 participants assigned to the active treatment  
129 condition were notified to complete two microdose sessions per day over a 6-week period. Prior  
130 to beginning a microdose session, participants completed a pre-intervention survey in which  
131 they reported their current mood (and completed a very brief imaginal exercise depending on  
132 their anxiety level) and selected a specific stressor domain for targeted training. Domain options  
133 included academics/work/career development, social situations, romantic relationships,  
134 finances, physical health, mental health, family and home life, and discrimination. The content of  
135 the training scenarios was modified to match common situations encountered for the different  
136 groups (e.g., to capture fears of negative evaluation, the undergraduate group would read about  
137 giving a class presentation while the staff would read about presenting at a staff meeting). Post-  
138 intervention surveys were also administered to assess changes in mood and provide additional  
139 resources and tips for emotion regulation and application of the CBM-I learning to daily life. At  
140 the end of the day, participants were instructed to complete a nightly survey inquiring about their  
141 mood and ability to think flexibly throughout the day. During this survey, participants had the  
142 option to pre-select notification times for the next day's microdose sessions.

143 A microdose session consisted of ~ 5 minutes of CBM-I training that aimed to reduce rigidly  
144 negative thinking patterns associated with anxiety. Training scenarios could consist of 10 CBM-I  
145 short scenarios (this occurred in the majority of sessions), or 1 long scenario, or 1 write-your-  
146 own scenario (except for the Discrimination domain, which did not include CBM-I; see 26). The  
147 variation was included to reduce repetitiveness and to introduce different tasks to increase

148 flexible thinking and the personal relevance of training. A short scenario was typically three  
149 sentences in length and consisted of an emotionally ambiguous story that raised a potential  
150 threat but was then resolved when the user completed the final word in the last sentence. The  
151 emotional resolution was reinforced through a subsequent comprehension question (see Figure  
152 1). A long scenario was the same as a short scenario except it also included a range of  
153 thoughts, feelings, or behaviors that could occur in a particular situation to help with seeing  
154 multiple different perspectives. Users were then prompted to write down their own thoughts that  
155 could be helpful in that situation. The write-your-own scenario invited participants to craft their  
156 own short CBM-I scenario based on a personally relevant anxiety-inducing situation. Users were  
157 then tasked with resolving the scenario in a positive or non-threatening way and coming up with  
158 reasons for why the chosen resolutions could be likely to occur. Figure 1 displays a screenshot  
159 of the app's homepage, domain selection page, and a short scenario example. More details on  
160 the intervention are available via Open Science Framework [28, 29].

161 **Fig 1. Screenshots of the HTC app**

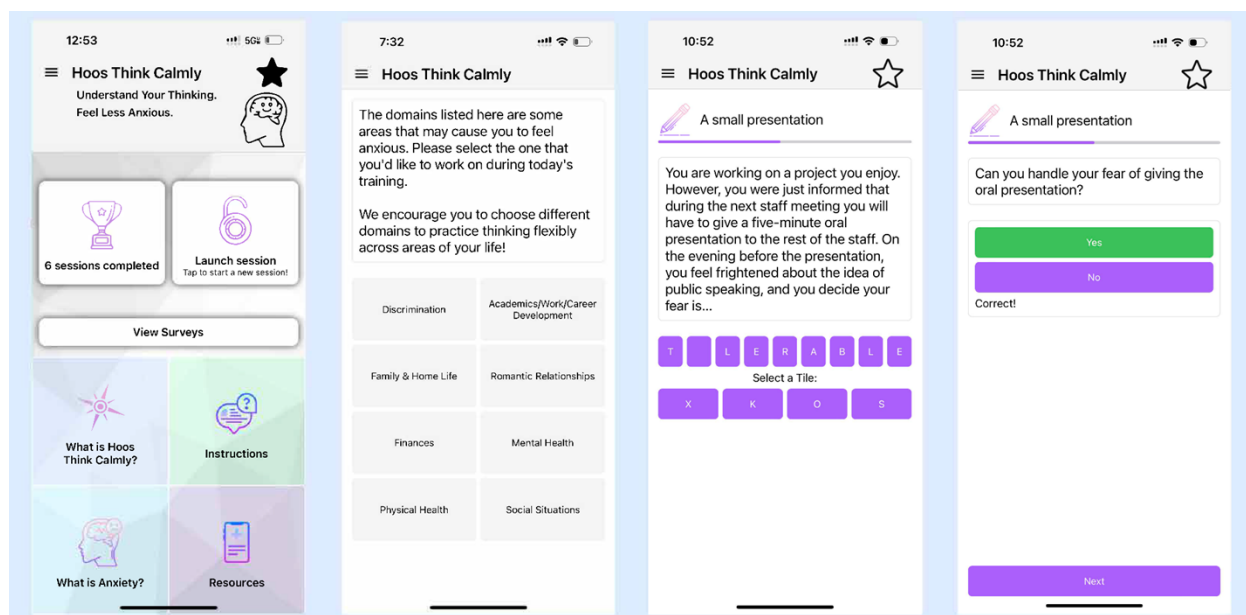

162

## 163 **Study Procedures and Data Collection**

164 This study used quantitative and qualitative approaches to understand user experience and  
165 acceptability of the HTC mobile health (mHealth) platform. Data was collected via  
166 questionnaires and semi-structured interviews. Four biweekly user experience questionnaires  
167 were administered to all participants assigned to the treatment condition throughout their study  
168 participation. The first three questionnaires were administered every two weeks during the 6-  
169 week study period, and the final questionnaire was administered at the 8-week mark as a post-  
170 study follow-up. In addition to survey questionnaires, a subset of participants who took part in  
171 the 6-week pilot RCT to test the HTC mobile application were selected to participate in a user  
172 feedback interview. The selection process involved purposive sampling based on group  
173 assignment, study progress, and time passed since enrollment. Participants who were assigned  
174 to the treatment condition and had completed at least 3 microdose sessions were randomly  
175 selected to participate in a feedback interview.

176 The interview selection process was initiated by inviting participants with the closest study  
177 enrollment date to the time of recruitment and moving backwards until our target accrual  
178 number was met. We aimed to complete approximately 20 interviews based on norms in the  
179 literature for papers with similar goals [30, 20] and also due to practical considerations. A total of  
180 89 interview invites were sent to faculty members, staff members, graduate students, and  
181 undergraduate students, and 22 interviews were completed using a semi-structured interview  
182 guide (S2 Text). Participant characteristics are provided in Table 1.

183



184 **Table 1. Characteristics of interviewee participants and survey respondents**

|                                                                                           | Questionnaire sample (n=95) |      | Interview sample (n=22) |      |
|-------------------------------------------------------------------------------------------|-----------------------------|------|-------------------------|------|
| Variable                                                                                  | n                           | %    | n                       | %    |
| <b>Role at university</b>                                                                 |                             |      |                         |      |
| Undergraduate                                                                             | 26                          | 27.4 | 5                       | 22.7 |
| Graduate                                                                                  | 31                          | 32.6 | 10                      | 45.5 |
| Faculty                                                                                   | 6                           | 6.3  | 3                       | 13.6 |
| Staff                                                                                     | 32                          | 33.7 | 4                       | 18.2 |
| <b>Gender/Sex</b> (the item did not distinguish between gender identity and sex at birth) |                             |      |                         |      |
| Woman                                                                                     | 76                          | 80.0 | 18                      | 81.8 |
| Man                                                                                       | 12                          | 12.6 | 3                       | 13.6 |
| Transgender Man                                                                           | 0                           | 0    | 0                       | 0    |
| Transgender Woman                                                                         | 0                           | 0    | 0                       | 0    |
| Other identity                                                                            | 0                           | 0    | 0                       | 0    |
| No answer provided                                                                        | 7                           | 7.4  | 1                       | 4.5  |
| <b>Race</b>                                                                               |                             |      |                         |      |
| White/European origin                                                                     | 63                          | 66.3 | 13                      | 59.1 |
| South Asian                                                                               | 7                           | 7.4  | 2                       | 9.1  |
| East Asian                                                                                | 7                           | 7.4  | 2                       | 9.1  |
| Black/African origin                                                                      | 4                           | 4.2  | 0                       | 0.0  |
| More than one race                                                                        | 1                           | 1.1  | 2                       | 9.1  |
| Other or Unknown                                                                          | 6                           | 6.3  | 2                       | 9.1  |
| No answer provided                                                                        | 7                           | 7.4  | 1                       | 4.5  |

| <b>Ethnicity</b>                  |                     |      |                     |      |
|-----------------------------------|---------------------|------|---------------------|------|
| Not Hispanic or Latino            | 83                  | 87.4 | 20                  | 90.9 |
| Hispanic or Latino                | 5                   | 5.3  | 1                   | 4.5  |
| No answer provided                | 7                   | 7.4  | 1                   | 4.5  |
| <b>Measures at study baseline</b> |                     |      |                     |      |
| OASIS                             | Mean 6.39 (SD=2.87) |      | Mean 6.52 (SD=2.42) |      |
| PHQ-2                             | Mean 1.63 (SD=1.46) |      | Mean 1.71 (SD=2.42) |      |
| PSS-4                             | Mean 6.88 (SD=3.10) |      | Mean 7.48 (SD=3.39) |      |

185 OASIS = Overall Anxiety Severity and Impairment Scale; Scores range from 0-20. A higher  
186 OASIS score indicates more severe anxiety symptoms.

187 PHQ-2 = Patient Health Questionnaire-2; Scores range from 0-6. A higher PHQ-2 score  
188 indicates more severe depression symptoms.

189 PSS-4 = Perceived Stress Scale-4; Scores range from 0-16. A higher PSS-4 score indicates  
190 more stress.

191 SD = standard deviation

192

## 193 **Analysis**

194 Following our pre-registration [21], interview data was analyzed using thematic analysis as  
195 outlined by Braun and Clarke [31]. All interviews were transcribed using Descript audio  
196 transcription service [32]. Each transcript was then checked against the original audio recording  
197 by a member of our research team. This was for the purpose of ensuring transcription accuracy  
198 and enhancing team familiarity with the data. During transcript review, team members noted  
199 initial themes found in the data.

200 After all interview transcripts had been reviewed, preliminary codes were discussed, and an  
201 initial codebook was created. We then used an iterative coding process, allowing for continual  
202 addition or deletion of codes to align with our data. To most effectively capture context and  
203 meaning, text was coded at the “level of meaning”, allowing a code to encapsulate a line,  
204 sentence, or paragraph [33]. Interviews were coded using Delve qualitative data analysis  
205 software [34]. Four coders were trained by conducting inter-coder reliability (ICR) tests. Inter-

206 coder reliability was measured using Krippendorff's alpha, a measure of reliability in content  
207 analysis [35]. We underwent six rounds of ICR testing and reached an ICR rating of 0.83. Each  
208 round of testing involved independent coding of the same transcript by each coder, followed by  
209 comparison and discussion of coding differences. Transcripts from different participant groups  
210 (faculty, staff, graduate, and undergraduate) were selected for each round of ICR testing to  
211 ensure representation of the entire data set [36]. Changes were made to the codebook  
212 throughout this process. Each codebook iteration, including the final version, can be found on  
213 Open Science Framework [37]. After an inter-coder reliability score greater than 0.80 had been  
214 established, official coding of the transcripts commenced. Due to prolonged ICR training, only  
215 two of the four trained coders were available for the official coding process. Given time  
216 constraints and the high ICR rating, deviations were made to the preregistration, with each  
217 transcript being coded by one of the two remaining coders instead of undergoing double coding.  
218 Weekly meetings were held to address coding challenges and refine the codebook. The lead  
219 author served as a moderator to help resolve disputes or provide clarification on coding issues.  
220 Thematic saturation was attained after analyzing 15 transcripts and was determined when no  
221 additional codes could be added to the codebook [38]. The final codebook consisted of 47 main  
222 codes (not including sub-codes) that were grouped into 10 themes. An initial thematic map was  
223 created to visualize the codes and their relationships. Of those 46 codes, 13 appeared in 50%  
224 or more interviews. A revised thematic map was created using the 13 most saturated codes,  
225 and 5 main themes were assigned (S1 Fig.). The full list of codes and definitions can be found  
226 in the codebook. Survey data was analyzed using descriptive statistics, including frequency  
227 counts and percentages.

## 228 **Results**

229 The results are categorized based on the 5 themes found in Table 2, along with examples of  
230 deidentified illustrative quotes. Considering the primary research goal for this paper was

231 learning users' impressions and suggestions from the qualitative feedback, and the survey data  
232 was included for triangulation purposes, we decided prior to the quantitative analyses to only  
233 examine those survey questions that aligned with the qualitative themes. Survey data are  
234 reported in Table 3.

235 **Table 2. Main Themes Identified and Frequency of Codes among Interview Participants**

| Theme                                 | Code                                                      | Total (n=22) |
|---------------------------------------|-----------------------------------------------------------|--------------|
| Effectiveness of the Training Program | Application of new coping strategies                      | 11 (50%)     |
|                                       | Perceived changes in stress/anxiety levels                | 14 (67%)     |
| Feedback on Training Sessions         | Relatability                                              | 21 (95%)     |
|                                       | Repetitiveness                                            | 12 (54%)     |
|                                       | Length                                                    | 18 (82%)     |
|                                       | Write-your-own                                            | 14 (64%)     |
| Barriers to Using the App             | Lack of understanding of intervention format or rationale | 12 (55%)     |
|                                       | Forgetfulness                                             | 12 (55%)     |
| Use Patterns                          | Used routinely                                            | 15 (68%)     |
|                                       | Used when reminded                                        | 11 (50%)     |
|                                       | Chosen academics/work/career development domain           | 18 (82%)     |
| Suggestions for Improvement           | Feature Suggestions                                       | 19 (86%)     |
|                                       | Domain Suggestions                                        | 16 (73%)     |

236

237

238

239 **Table 3: Results from Questionnaires**

| Survey question                                                                                        | 1 =<br>Not at all    | 2 =<br>Slightly           | 3 =<br>Somewhat         | 4 =<br>Mostly            | 5 =<br>Very         | Mean ±<br>SD   |
|--------------------------------------------------------------------------------------------------------|----------------------|---------------------------|-------------------------|--------------------------|---------------------|----------------|
| 1. How helpful do you find Hoos Think Calmly for reducing your anxiety?                                | 35<br>(15.63%)       | 57<br>(24.45%)            | 97<br>(43.30%)          | 30<br>(13.39%)           | 5<br>(2.23%)        | 2.61 ±<br>0.98 |
| 2. How much could you relate to the stories presented during training sessions?                        | 9<br>(4.31%)         | 57<br>(27.28%)            | 76<br>(36.36%)          | 46<br>(22.01%)           | 19<br>(9.09%)       | 3.04 ±<br>1.02 |
| 3. How believable did you find the stories' endings in terms of those outcomes happening in your life? | 8<br>(3.83%)         | 52<br>(24.88%)            | 67<br>(32.06%)          | 60<br>(28.71%)           | 18<br>(8.61%)       | 3.14 ±<br>1.02 |
| Survey question                                                                                        | 1 =<br>Way too short | 2 =<br>Somewhat too short | 3 =<br>The right length | 4 =<br>Somewhat too long | 5 =<br>Way too long | Mean ±<br>SD   |
| 4. I find the [length of the] training sessions to be:                                                 | 0<br>(0.00%)         | 1<br>(1.09%)              | 46<br>(50.00%)          | 41<br>(44.57%)           | 2<br>(2.17%)        | 3.49 ±<br>0.57 |

\*Percentages do not add up to 100 when "Prefer not to answer" was endorsed

240  
241  
242

**Theme 1: Effectiveness of Training Program**

243 ***Application of New Coping Strategies***

244 Of the interview participants, 50% (11/22) expressed an ability to effectively apply new coping  
245 strategies (e.g. flexible thinking) that they learned from the program to their real-life situations.

246 *There was this scenario that is about the advisor frowning in front of you and that*

247 *instinctively made me think that I did something wrong or what I said is something*

248 *stupid, but the answer was that people frown when they think about something, and that*  
249 *scenario really helped me to think differently when I present my work in front of other*  
250 *people or in front of advisors. [Grad 13]*

### 251 ***Perceived Changes in Stress or Anxiety***

252 In addition, 64% (14/22) of interview participants discussed the program's impact on their stress  
253 or anxiety. The majority of those participants (8/14, 62%) expressed an overall positive change  
254 in symptoms, stating a reduction in their stress or anxiety levels.

255 *It [the program] definitely did help...I immediately go to the worst case scenario, so I*  
256 *thought it helped like in the heat of the moment for me to redirect my train of thought to*  
257 *somewhere that's more productive and less doomsday. [Undergrad 35]*

258 Some of those participants (5/14, 38%) reported no change to their stress or anxiety while using  
259 the app.

260 *This just didn't do anything for me. It just added another thing in my day that I had to*  
261 *think about and take care of that didn't feel like it was giving me anything back.*  
262 *[Undergrad 39]*

263 Additionally, two participants (2/14, 14%) expressed a negative change in symptoms, reporting  
264 an increase in their stress or anxiety levels from use of the app.

265 *Some [scenarios] seemed to cause me to worry more about things. Like I understand*  
266 *that it's like guiding you through stressful situations and it's not always gonna have a*  
267 *positive outcome for everything, but some of them were a little bit like, Ooh, that's kind of*  
268 *scary to think about. [Undergrad 28]*

269 It is worth noting that one participant reported experiencing both positive and negative changes  
270 in their stress or anxiety levels. Therefore, there are a total of 15 responses indicating positive,  
271 negative, or no change, out of the 14 participants who commented on the program's impact.

272 Additionally, a survey questionnaire was sent to all participants at the 2nd, 4th, 6th, and 8th  
273 week marks of their study participation to assess the effectiveness of the HTC program in

274 reducing their anxiety. A total of 225 responses were received (participants submitted  
275 responses on multiple occasions, hence the greater number of responses than participants),  
276 with the most common response (97/225, 43%) being that HTC was somewhat helpful at  
277 reducing their anxiety (see Table 3).

## 278 **Theme 2: Feedback on Training Sessions**

### 279 ***Relatability***

280 Out of the 22 interview participants, 95% (21/22) discussed the relatability of the training  
281 scenarios. Among those 21 participants, approximately half (11/21, 52%) noted that the training  
282 scenarios resonated with their own experiences and feelings.

283 *I thought they were really [applicable], and sometimes I would even laugh because they*  
284 *would be so accurate that I'm like, yeah, I went through that like last week or so. [Grad*  
285 *49]*

286 *And I thought especially for academics, the situation or the stories that were there were*  
287 *quite relatable. Like I thought, yeah, this is exactly what I'm feeling right now or what I'm*  
288 *stressed about right now. [Grad 35]*

289 Two thirds of participants (14/21, 67%) indicated that they sometimes did not find the training  
290 scenarios relatable.

291 *I felt like the demographic was younger than I am. It was a lot of you've got a new baby,*  
292 *you've got a young child, or you've got parents who disapprove of what you're doing. My*  
293 *parents are dead. This is not a thing I'm thinking about now... It just tended to not be*  
294 *applicable to me. [Faculty 8]*

295 *There were times where I thought, oh, this doesn't relate to me at all, and why am I*  
296 *taking time to do this? [Staff 39]*

297 Notably, 4 participants mentioned finding the training scenarios to be relatable at times while not  
298 at others, accounting for the 25 responses among the 21 participants. Additionally, it is worth  
299 mentioning that all 3 faculty interview participants found the training scenarios to be unrelatable.  
300 Similar trends were observed in the user experience questionnaire. Participants were asked to  
301 evaluate the relatability of the stories as well as the believability of the stories' endings at the  
302 2nd, 4th, and 6th week marks of their study participation, resulting in a total of 209 responses.  
303 The majority of participants provided responses within moderate ranges for both questions, with  
304 36% (76/209) finding the stories somewhat relatable and 32% (67/209) finding the endings  
305 somewhat believable (see Table 3). On average, faculty members tended to rate the scenarios  
306 as less relatable and the endings as less believable compared to the other participants.

### 307 ***Repetitiveness***

308 Among the interview participants, 54% (12/22) found the training sessions to be repetitive. In  
309 certain aspects, repetition was intentionally incorporated into HTC as a way to give users  
310 repeated practice in thinking more flexibly and exposure to different scenarios. However, some  
311 found the repetitive writing style of the scenarios resulted in predictable outcomes, reducing the  
312 effectiveness of the training sessions.

313 *But at some point it just became very repetitive and instead of getting something out of*  
314 *it, I just saw a pattern and how to fix it. [Undergrad 46]*

315 Others experienced boredom due to the repetition of similar stories and themes.

316 *There were only so many scenarios or stories. And even though they were still very*  
317 *much applicable to my life, I could anticipate what those stories were gonna be and I just*  
318 *got bored. [Grad 35]*

### 319 ***Length***

320 Of the interview participants, 82% (18/22) commented on the length of the training sessions.

321 Each microdose session consisted of 10 CBM-I scenarios, along with pre-and post- intervention



322 questionnaires. Researchers estimated that completing one microdose session would require  
323 roughly 5-10 minutes. Among the 18 participants that discussed session length, the majority  
324 (13/18, 72%) found the training sessions to be an appropriate length, although some expressed  
325 a preference for shorter sessions on occasion.

326 *I would've liked for it to be shorter, but at the same time I can understand that the longer*  
327 *you're thinking about it, the more realistically and detailed you can imagine your*  
328 *situation. And with this topic, you really kind of should be spending a little bit more time*  
329 *on it than you want to. So I think it was an appropriate length, even though at times it*  
330 *was not fun. [Staff 41]*

331 *I thought they were a good length because I didn't have to worry about starting one and*  
332 *not being able to finish it. [Undergrad 35]*

333 However, 28% (5/18) of participants that discussed length considered them too long, potentially  
334 impacting engagement.

335 *The session was just a bit long and I think maybe that was one reason that kept me from*  
336 *doing it as often. I just dreaded doing it because maybe it was too long. [Grad 26]*

337 For comparison/triangulation, a survey question regarding session length was administered to  
338 all participants during their 2nd week of study participation. Participants were asked how they  
339 felt about the session length and 92 responses were received with 50% (46/92) of participants  
340 indicating that the sessions were of the right length and 45% (41/92) of participants indicating  
341 that the sessions were too long (see Table 3).

### 342 **Write-your-own**

343 Of the interview participants, 64% (14/22) of interview participants provided feedback on the  
344 write-your-own scenario prompt. Some participants enjoyed the write-your-own scenario  
345 because it gave them a chance to apply their learning to real life situations.

346 *I think that was my favorite part because it kind of forced me to think a little more deeply*  
347 *about the modules I was doing rather than just answering the questions. [Undergrad 35]*

348 Conversely, others found the write-your-own scenario to be frustrating because it took too long  
349 or felt redundant. Additionally, concerns about privacy surfaced, particularly among faculty and  
350 staff members, regarding inputting personal stories into the app.

351 *Crafting my own stories just irritated me...the homework aspect of it felt icky. But then*  
352 *also I didn't really want to because this is where I work. I didn't want to put scenarios in*  
353 *there...I think the exercise of thinking through my own scenarios would've been helpful*  
354 *if it wasn't writing them into the app. [Staff 39]*

### 355 **Theme 3: Barriers to Using the App**

#### 356 ***Lack of Understanding of Intervention Format or Rationale***

357 Among the interview participants, 55% (12/22) expressed a lack of understanding of how to  
358 engage with the training sessions or the purpose of the intervention. Participants were given the  
359 flexibility to choose when and how many training sessions they completed on a given day,  
360 although it was recommended that they complete at least 2 microdose sessions. However,  
361 some participants found the structure of the app and study expectations to be ambiguous.  
362 Similarly, some participants were confused about the nature of the CBM-I training and did not  
363 understand the purpose of the tasks they were being asked to complete or how to engage with  
364 the stories.

365 *And at least at the beginning of the study I was like, what am I required to do? What are*  
366 *the tasks for today? [Grad 52]*

367 *And so the very first survey, which was kind of longer, I thought, wait, is this like a*  
368 *reading comprehension survey? Like I really didn't know what it was. And so I would*  
369 *read the scenario and then it would say essentially, what do you think would be*  
370 *happening next? And I'm like, I don't know. [Faculty 8]*

371 After each training scenario, participants were asked questions about the story and were  
372 supposed to answer based only on information given in the scenario. The purpose of this was to  
373 practice thinking in new ways about different situations. However, some participants found it  
374 unclear whether they were expected to answer questions based on information given in the  
375 story or based on their current experiences. This lack of understanding led some to feel  
376 confused when their answers were marked as incorrect.

377 *I just do not understand why it would say wrong when both of them [answer choices]  
378 could be logical, and even sometimes I chose one that seemed like the thing that I would  
379 make happen or that was happening in my life, and it'd be wrong...why am I being told  
380 I'm wrong? [Faculty 1]*

### 381 **Forgetfulness**

382 Of the interview participants, 55% (12/22) cited forgetfulness as a reason for not using the app.

383 *I would usually just forget...I'm like already stressed out and then I'd scroll past it [the  
384 app], and I'm like, oh my god, I've forgotten to do that. [Undergrad 25]*

385 Although the app did send push notifications, some participants encountered issues receiving  
386 notifications, which contributed to forgetfulness.

387 *If I don't get the notification on my phone and if I'm out, I'm not going to remember this.  
388 [Grad 31]*

389 Some participants who mentioned not using the app due to forgetfulness expressed a  
390 preference for different types of notifications, such as calendar reminders rather than push  
391 notifications.

392 *It would've been better and more useful if it [reminders] would just populate [in my phone  
393 calendar] because I live or die by what's in my calendar. And if it's not on my calendar, I  
394 forget because there's just so much that's going on all day long. [Staff 39]*

395 **Theme 4: Use Patterns**

396 ***Used Routinely***

397 Of the interview participants, 68% (15/22) used the app as part of their daily routine. These  
398 individuals found it most helpful to stick to a consistent schedule of using the app at the same  
399 time every day, rather than varying the time day by day or using the app specifically during  
400 moments of stress or anxiety.

401 *I mostly did it at the same time each day just because of how my schedule works.*

402 *[Faculty 8]*

403 *I would do it in the morning, and then right before I went to bed. I don't really remember*

404 *doing it specifically if I was super anxious about something [Grad 41]*

405 ***Used When Reminded***

406 Similarly, 50% (11/22) of interview participants used the app because they received a  
407 notification or reminder.

408 *I also liked that the app would send reminders, like you could set the time for every day*

409 *that it would send reminders and as someone who also has been diagnosed with ADHD,*

410 *like that's the only way I can get work done is if I have reminders. [Grad 35]*

411 *I liked the feature where you could set a reminder to do them [training sessions] because*

412 *that was like how I remembered to do it most days. [Undergrad 28]*

413 ***Chosen Academics/Work/Career Development Domain***

414 Participants also shared which stressor domain they used most often. Of the 8 domains to  
415 choose from, 82% (18/22) of interview participants stated they found the academics/work/career  
416 domain to be most important.

417 *I feel like I chose the work one most of the time because that is honestly where most of*

418 *my anxiety comes from. [Staff 45]*

419 *I tried to hit them all [domains], but the biggest source of stress in my life did happen to*  
420 *be graduate school...And so the graduate school one is definitely where I focused. [Grad*  
421 *11]*

## 422 **Theme 5: Suggestions for Improvement**

### 423 ***Feature Suggestions***

424 Of the interview participants, 86% (19/22) suggested additional features to improve the apps  
425 functionality or enhance engagement. Among those participants, some suggested a progress  
426 tracking feature that would allow them to view their pending and completed tasks.

427 *If you want people to take three surveys a day or something, you can show like a little*  
428 *Domino's pizza loading bar and be like, you've already done 33%, you have two more*  
429 *left. Or like a checkbox or something for people to tangibly be like, yeah, I did this. [Staff*  
430 *41]*

431 *One thing that I just kind of thought of is I used the Duo Lingo app to help me to practice*  
432 *my French, and it tells me how well I've done recently. And if I have a streak of days in a*  
433 *row, it lets me know, hey, you've got this many days in a row. And it wasn't always clear*  
434 *to be able to see what my activity [in the HTC app] had been recently. [Faculty 4]*

435 Others focused more on enhancing the customization and personalization of the app through  
436 tailored scenario content, adjustable training lengths, and flexible notifications. For example,  
437 some participants noted that certain scenario content was not relatable to their specific life  
438 stage.

439 *I don't know if you can collect some sort of information on the individual who's taking it,*  
440 *but a lot of times, it [the scenarios] would be something like, you're going on a Tinder*  
441 *date, and I'm married with two kids. That's pretty hard for me to imagine. [Staff 41]*

442 Consequently, these participants often suggested personalizing the content by filtering  
443 scenarios specific to their demographic to enhance relevance.

444 *If there was some way to like screen participants and tailor the questions, I don't know,*  
445 *but if it was tailored to something that was more relatable to each participant, I feel like*  
446 *they could get more out of this program. [Undergrad 46]*

447 Additionally, some expressed a desire to customize the length of the training sessions.

448 *I hoped it was longer when I had a bad day. And I hoped it was shorter when I was*  
449 *having a busy day. Maybe it can be helpful if I can adjust the length. [Grad 13]*

450 Lastly, some participants suggested enhancing the notification system and expressed wanting  
451 more customizable notification preferences, including frequency and delivery method.

452 *I wish that just the average number of notifications was a little lower. And maybe people*  
453 *can opt into more or opt out of more. [Faculty 4]*

454 *Maybe something that should be integrated is emails along with the notifications...if*  
455 *you're on your computer and not on your phone, maybe the different notifications would*  
456 *help. [Grad 41]*

### 457 **Domain Suggestions**

458 Finally, 73% (16/22) of interview participants suggested additional domains or ways to improve  
459 the existing ones. Of those 16 participants, 4 (25%) provided specific suggestions to improve  
460 the discrimination domain. The discrimination domain differed from the other 7 domains in that it  
461 did not provide specific scenarios for CBM-I training. Instead, it provided tools and resources  
462 for: 1) reporting discrimination or harassment, 2) self-care and wellness, 3) allyship (supporting  
463 others who have experienced discrimination, marginalization, or harassment), 4) community  
464 support, and 5) activism. Some participants appreciated how this domain was set up, while  
465 others mentioned wishing that this domain offered CBM-I training, similar to the other domains.

466 *I think I clicked on the discrimination topic one time...but it just brought me straight to*  
467 *links for like resources. So I think expanding that topic could be good because with more*  
468 *and more DEI conversations and stuff like that, people get really uncomfortable talking*  
469 *about it. So I think having something more in that area, like the resources were good and*

470 *I'm grateful that they were there, but I think having something similar where you could*  
471 *kind of work out your ideas there too. [Staff 41]*  
472 *But if I click that category, then it shows that there's like this, this, and this kind of*  
473 *resource, rather than showing up the scenarios like it did for the other categories, and I*  
474 *felt that a little unhelpful...for instance, I always struggle to think that my English is not a*  
475 *problem, and that's also true, but like sometimes when I speak some wrong sentences, I*  
476 *become very small and start to be very conscious about that. But people around me are*  
477 *more likely to be friendly and do not really care about that. So I hope there was some*  
478 *scenarios that helped me think that like all of their reactions are not really a*  
479 *discrimination. I don't, I know it can be very tricky, like it can be the app justifying there's*  
480 *no discrimination, but still I want something that can help or support mentally. [Grad 13]*

481 Others suggested additional resources and tools within the discrimination domain that they  
482 wished were provided. This included adding resources specific to political and religious  
483 discrimination.

484 *The discrimination that I faced that made me go on was political discrimination...So I*  
485 *went on there to see if I could get any help with that. But the resources I don't think were*  
486 *really applicable to me in that sense. [Grad 26]*  
487 *I don't know if you guys had something about religion...I think that's an important aspect.*  
488 *Maybe that could go with the discrimination. [Grad 49]*

489 Additional content recommendations were proposed for other domains. These include  
490 incorporating more scenarios tailored to an older demographic, such as addressing anxiety  
491 related to retirement, making friends later in life, dealing with a child's college rejection, coping  
492 with the loss of a family member, or managing the estate of a deceased parent.  
493 In addition to suggestions made to the existing domains, other participants provided  
494 suggestions to add new domains, such as a domain specific to international students.

495 *I don't recollect right now but I don't know if there was a separate section that was*  
496 *directed towards international students...because there's so many international students*  
497 *and we have like our own set of problems, which sort of loosely relate to discrimination,*  
498 *but then also being homesick, being away from family, which weren't there. [Grad 35]*

## 499 **Discussion**

500 This study used mixed methods to explore users' experiences with the HTC platform and collect  
501 feedback on acceptability and ways to improve the app, which may also inform future designs of  
502 DMHIs more broadly. Qualitative data was collected via user feedback interviews and  
503 quantitative data via user experience questionnaires. Specifically, user experience questions  
504 regarding the effectiveness of the training program, the relatability of the training scenarios, and  
505 the length of the training sessions were analyzed to help validate and enrich the qualitative  
506 results (see Table 3). Results showed that the quantitative findings aligned with the qualitative  
507 data as the majority of both survey and interview participants found the program to be at least  
508 slightly or somewhat helpful in reducing or managing their anxiety or stress. Similarly, both  
509 survey and interview data yielded varied opinions on the relatability of the stories and found the  
510 length of the training sessions to either be an appropriate length or slightly too long. Overall,  
511 results supported the acceptability of the program.

512 Among those who did not perceive the HTC program as effective, there seemed to be a gap in  
513 the relatability of content and alignment with needs/goals, potentially influencing their perceived  
514 efficacy. For example, some participants expressed not experiencing significant stress or  
515 anxiety prior to using the app, which could explain their limited observations of changes in their  
516 stress levels. Given participants were not required to meet a specific anxiety threshold to join  
517 the study, it is possible that other participants had similar experiences, though the mean  
518 baseline OASIS score indicated significant anxiety on average (a score of 8 is typically  
519 considered a clinical cutoff where most users would meet criteria for an anxiety disorder



520 diagnosis and our sample mean was ~6.5). Moreover, one participant reported having other  
521 mental health conditions outside of anxiety that the app is not targeted to treat. Some  
522 participants also reported a lack of comprehension regarding the intervention's purpose, and a  
523 few stated they downloaded the app expecting it to be more meditative in nature. These findings  
524 underscore the importance of providing a clear introduction to the program's format and  
525 rationale during enrollment, allowing the user to understand the overall structure of the app and  
526 determine if it is a good fit for them. However, it is important to note that HTC does provide  
527 written and video explanations regarding the program rationale, learning goals, and ways to use  
528 the app during the first training session. This raises questions about whether users are  
529 effectively absorbing the introductory content or if changes are needed to present the program  
530 overview more effectively. Further work is encouraged in this area.

531 While many users did report perceived benefits from the program, qualitative interviews were  
532 conducted with an emphasis on gathering feedback for future app versions. Therefore, this  
533 discussion primarily centers on suggestions to enhance future iterations of HTC and DMHIs  
534 more broadly. For example, offering explicit instructions on program expectations and guidelines  
535 for recommended use in multiple places may enhance user engagement, given this information  
536 seems to be readily missed or skimmed. Consistent with prior qualitative research, insufficient  
537 task explanations have been shown to deter users from continuing with digital health  
538 interventions [39]. Therefore, it is essential to present instructions clearly, and it may help to use  
539 various mediums [40]. HTC incorporates text-based and video instructions; to enhance clarity  
540 regarding task expectations, our users specifically suggest implementing a daily progress  
541 tracker, which could include gamification elements that might increase user motivation and  
542 engagement [41] while also clarifying what tasks need to be completed each day.

543 Consistent with other studies, our findings also suggest increasing app personalization would be  
544 particularly beneficial in the context of CBM-I scenario content, as some users expressed  
545 dissatisfaction with the relatability of the stories [42, 43]. Given CBM-I relies on users imagining

546 themselves in various situations to promote more flexible thinking, creating more personally  
547 relevant content may enhance users' ability to engage with the exercises more effectively.  
548 Therefore, we suggest future research should explore increasing personalization by using  
549 demographic information to filter content based on factors such as age, relationship status, and  
550 occupation, or assessing the types of interactions or places where each person tends to  
551 experience anxiety, or the particular unhelpful interpretations they tend to make. We would also  
552 like to highlight that despite our efforts to recruit faculty members, engaging them proved  
553 challenging, resulting in a small sample size for this study. However, it is worth noting that all  
554 three faculty participants indicated that the study content was not relatable. Therefore, we  
555 believe increasing app personalization may be especially beneficial for this demographic.  
556 Along with desiring personalized training content, users also value flexibility and autonomy,  
557 particularly expressing a desire for more customizable notification and content delivery options.  
558 Notifications are of particular importance given a main barrier reported to engaging with the  
559 HTC platform was forgetfulness. Additionally, many participants reported using the program  
560 specifically when reminded and appreciated that HTC allowed them to schedule push  
561 notifications at specific times. To further enhance notification customization, we recommend  
562 offering users a range of delivery options such as push notifications, emails, or calendar  
563 reminders. Other research has shown that sending notifications containing tailored messages  
564 may increase engagement [44].

565 Similarly, some participants expressed the desire to customize content type and length. For  
566 example, the HTC program provided three CBM-I training scenario types: long scenarios, short  
567 scenarios, and write-your-own scenarios. Some participants reported receiving a write-your-own  
568 training scenario, but not having the time or bandwidth to complete it at the moment, leading  
569 them to close the app entirely. They wished for the option to skip or choose certain scenario  
570 types as needed. Additionally, some participants expressed a desire to customize the length of  
571 microdose sessions, stating that sometimes they wanted to complete more or fewer than 10

572 training scenarios in one session. Although allowing participants to customize the type and  
573 length of training sessions may increase app engagement and user satisfaction, there is a  
574 concern that increasing customizability of training scenario type and length may sacrifice  
575 program effectiveness. Further work is needed to determine the best balance between  
576 increasing training flexibility and maintaining intervention effectiveness (e.g., ensuring users  
577 complete an adequate dose of training).

578 Last, offering more diverse training content is likely important for increasing engagement and  
579 accessibility. Research indicates that repetitive training content can lead to boredom and  
580 disinterest [45, 43]. Incorporating a wider variety of scenario content and formats, including  
581 those suggested by users, such as scenarios relevant to international students, may improve  
582 acceptability and adherence. We recommend continuing to involve users in the co-design  
583 process for future iterations of HTC, particularly to develop more relevant scenarios for  
584 marginalized communities. This approach ensures that the content remains engaging and  
585 inclusive [46].

586 Overall, our findings suggest that HTC is viewed as somewhat acceptable and effective at  
587 reducing stress and anxiety, and we provide suggestions for increasing user engagement and  
588 app satisfaction across HTC and other mHealth platforms. To enhance engagement, we  
589 recommend implementing a robust notification system and providing clear instructions on study  
590 tasks and app use expectations through interactive modules and progress trackers. Additionally,  
591 we recommend further personalizing content and increasing customizable features to boost  
592 user satisfaction and adherence. Lastly, we emphasize the importance of involving users in the  
593 co-design process of DMHIs to ensure content remains relevant and meaningful to the intended  
594 audience.

## 595 **Limitations**

596 Several limitations should be considered in interpreting this interview and survey feedback. In  
597 some cases, individual qualitative interviews of participants took place a few months after their

598 initial use of the intervention. This gap may have biased participants' reflections regarding their  
599 experience with HTC or its effectiveness. To address this, future iterations of the intervention  
600 could schedule post-treatment interviews more promptly after the completion of the program to  
601 gather participants' more immediate impressions of the program, as well as some interviews  
602 later to determine longer term impacts of the program.

603 Furthermore, while the sample size is consistent with related studies in the literature [20, 30], it  
604 likely does not sufficiently represent the experience of all participants, especially considering the  
605 potential for sampling biases among the subset of users who agreed to take part in the post-  
606 intervention interviews. Moreover, we did not screen users for elevated anxiety before  
607 participation, so some participants did not meet a standard cutoff for clinical anxiety. This could  
608 skew participants' perception of the app's effectiveness if they do not struggle with anxiety or if  
609 they struggle with a different mental health condition that the app is not targeted to treat. In the  
610 future, screening for individuals who are high in trait, social, or generalized anxiety could provide  
611 a more appropriate sample to study the program's effectiveness (though we also value letting  
612 users choose whether they believe the program is something they want and need, as we did in  
613 the current study). We also did not require participants to stop other interventions while using  
614 HTC; this was done to increase external validity but we do not know how the experience of  
615 using HTC varies based on whether it is used on its own or as an adjunct to other forms of care.  
616 Finally, while the coders had varying levels of familiarity with HTC and considered diverse  
617 perspectives in the interviews, there is a possibility of reflexivity within the coding process.

## 618 **Conclusions**

619 We collected qualitative interview data and quantitative survey data to better understand user  
620 experiences of the HTC platform and suggestions for its improvement. Themes that appeared in  
621 over half of the interviews regarding the effectiveness of HTC included an ability to apply new  
622 coping strategies in daily life and a perceived change in anxiety levels post-treatment. The most  
623 common response indicated that HTC was somewhat helpful at reducing anxiety. There were

624 also many suggestions for improvements to enhance relatability and personalization of training  
625 content to better sustain engagement, along with a need to improve understanding of the  
626 program's format and rationale, and easy ways for users to be reminded to use the program.  
627 Together, these findings point to the importance of iterative intervention development and  
628 regularly partnering with users to co-design DMHIs so they are acceptable, feasible, and can  
629 meet the needs and preferences of diverse users.

## 630 **References**

- 631 1. Meeks K, Peak AS, Dreihaus A. Depression, anxiety, and stress among students,  
632 faculty, and staff. *Journal of American College Health*. 2021 Mar 24;71(2):1–7.
- 633 2. Kazdin AE. Addressing the treatment gap: A key challenge for extending evidence-  
634 based psychosocial interventions. *Behaviour Research and Therapy*. 2017  
635 Jan;88(88):7–18.
- 636 3. Weissinger G, Ho C, Ruan-lu L, Van Fossen C, Diamond G. Barriers to mental health  
637 services among college students screened in student health: A latent class analysis.  
638 *Journal of American College Health*. 2022 Jul 26;1–7.
- 639 4. Wagner B, Snoubar Y, Mahdi YS. Access and efficacy of university mental health  
640 services during the COVID-19 pandemic. *Front. Public Health*. 2023;11:1269010.
- 641 5. Hammoudi Halat D, Soltani A, Dalli R, Alsarraj L, Malki A. Understanding and Fostering  
642 Mental Health and Well-Being among University Faculty: A Narrative Review. *J Clin*  
643 *Med*. 2023 Jun 30;12(13):4425. doi: 10.3390/jcm12134425. PMID: 37445459; PMCID:  
644 PMC10342374.
- 645 6. Wright JH, Mishkind M. Computer-Assisted CBT and Mobile Apps for Depression:  
646 Assessment and Integration Into Clinical Care. *FOCUS*. 2020 Apr;18(2):162–8.
- 647 7. Lattie EG, Adkins EC, Winquist N, Stiles-Shields C, Wafford QE, Graham AK. Digital  
648 Mental Health Interventions for Depression, Anxiety, and Enhancement of Psychological

- 649 Well-Being Among College Students: Systematic Review. *J Med Internet Res*. 2019 Jul  
650 22;21(7):e12869. doi: 10.2196/12869. PMID: 31333198; PMCID: PMC6681642.
- 651 8. Davies EB, Morriss R, Glazebrook C. Computer-delivered and web-based interventions  
652 to improve depression, anxiety, and psychological well-being of university students: a  
653 systematic review and meta-analysis. *J Med Internet Res*. 2014 May 16;16(5):e130. doi:  
654 10.2196/jmir.3142. PMID: 24836465; PMCID: PMC4051748.
- 655 9. Fodor LA, Georgescu R, Cuijpers P, Szamoskozi Ş, David D, Furukawa TA, et al.  
656 Efficacy of cognitive bias modification interventions in anxiety and depressive disorders:  
657 a systematic review and network meta-analysis. *The Lancet Psychiatry*. 2020  
658 Jun;7(6):506–14.
- 659 10. Vrijssen JN, Grafton B, Koster EHW, Lau J, Wittekind CE, Bar-Haim Y, et al. Towards  
660 implementation of cognitive bias modification in mental health care: State of the science,  
661 best practices, and ways forward. *Behaviour Research and Therapy*. 2024 Aug  
662 1;179:104557. doi: 10.1016/j.brat.2024.104557. PMID: 38797055.
- 663 11. Martinelli A, Grüll J, Baum C. Attention and interpretation cognitive bias change: A  
664 systematic review and meta-analysis of bias modification paradigms. *Behaviour  
665 Research and Therapy*. 2022 Aug;157:104180.
- 666 12. Murphy R, Hirsch CR, Mathews A, Smith K, Clark DM. Facilitating a benign  
667 interpretation bias in a high socially anxious population. *Behav Res Ther*. 2007  
668 Jul;45(7):1517-29. doi: 10.1016/j.brat.2007.01.007. Epub 2007 Feb 4. PMID: 17349970.
- 669 13. Larrazabal MA, Eberle JW, Vela de la Garza Evia A, Boukhechba M, Funk DH, Barnes  
670 LE, et al. Online cognitive bias modification for interpretation to reduce anxious thinking  
671 during the COVID-19 pandemic. *Behav Res Ther*. 2024;173(104463):104463.
- 672 14. Eberle JW, Daniel KE, Bae S, Behan HC, Silverman AL, Calicho-Mamani C, et al.  
673 Web-based interpretation training to reduce anxiety: A sequential, multiple-assignment

- 674 randomized trial. *Journal of Consulting and Clinical Psychology*. 2024;92(6), 367–384.  
675 doi: 10.1037/ccp0000896.
- 676 15. Ji JL, Bae S, Zhang D, Calicho-Mamani CP, Meyer MJ, Funk D, et al. Multi-session  
677 online interpretation bias training for anxiety in a community sample. *Behav Res Ther*.  
678 2021;142(103864):103864.
- 679 16. Garrido S, Millington C, Cheers D, Boydell K, Schubert E, Meade T, et al. What Works  
680 and What Doesn't Work? A Systematic Review of Digital Mental Health Interventions for  
681 Depression and Anxiety in Young People. *Front. Psychiatry*. 2019;10:759.
- 682 17. Baumel A, Muench F, Edan S, Kane JM. Objective User Engagement With Mental  
683 Health Apps: Systematic Search and Panel-Based Usage Analysis. *Journal of Medical*  
684 *Internet Research*. 2019 Sep 25;21(9):e14567.
- 685 18. Balcombe L, De Leo D. Evaluation of the Use of Digital Mental Health Platforms and  
686 Interventions: Scoping Review. *Int J Environ Res Public Health*. 2022 Dec 26;20(1):362.  
687 doi: 10.3390/ijerph20010362. PMID: 36612685; PMCID: PMC9819791.
- 688 19. Borghouts J, Eikey E, Mark G, De Leon C, Schueller SM, Schneider M, Stadnick N,  
689 Zheng K, Mukamel D, Sorkin DH. Barriers to and Facilitators of User Engagement With  
690 Digital Mental Health Interventions: Systematic Review. *J Med Internet Res*. 2021 Mar  
691 24;23(3):e24387. doi: 10.2196/24387. PMID: 33759801; PMCID: PMC8074985.
- 692 20. Palinkas LA. Qualitative and mixed methods in mental health services and  
693 implementation research. *J Clin Child Adolesc Psychol*. 2014;43(6):851-61. doi:  
694 10.1080/15374416.2014.910791. PMID: 25350675; PMCID: PMC4212209.
- 695 21. Patel S, Akhtar A, Malins S, Wright N, Rowley E, Young E, et al. The Acceptability and  
696 Usability of Digital Health Interventions for Adults With Depression, Anxiety, and  
697 Somatoform Disorders: Qualitative Systematic Review and Meta-Synthesis. *Journal of*  
698 *Medical Internet Research*. 2020 Jul 6;22(7):e16228.

- 699 22. Ludlow K, Russell JK, Ryan B, Brown RL, Joynt T, Uhlmann LR, et al. Co-designing a  
700 digital mental health platform, “Momentum”, with young people aged 7–17: A qualitative  
701 study. *DIGITAL HEALTH*. 2023 Jan 1;9.
- 702 23. Shkel J, Green G, Le S, Kaveladze B, Marcotte V, Rushton K, Nguyen T, Schueller SM.  
703 Understanding Users' Experiences of a Novel Web-Based Cognitive Behavioral Therapy  
704 Platform for Depression and Anxiety: Qualitative Interviews From Pilot Trial Participants.  
705 *JMIR Form Res*. 2023 Jun 20;7:e46062. doi: 10.2196/46062. PMID: 37338967; PMCID:  
706 PMC10337366.
- 707 24. Livermon S, Michael A, Petz KD, Toner ER, Teachman B. A Mobile-Based Intervention  
708 to Reduce Stress, Anxiety, and Depression Among University Students, Faculty, and  
709 Staff: Qualitative Study on Users' Experiences [Internet]. OSF; 2023. Available from:  
710 [osf.io/a46hb](https://osf.io/a46hb)
- 711 25. Cofie N, Braund H, Dalgarno N. Eight ways to get a grip on intercoder reliability using  
712 qualitative-based measures. *Can Med Educ J*. 2022 May 3;13(2):73-76. doi:  
713 [10.36834/cmej.72504](https://doi.org/10.36834/cmej.72504). PMID: 35572014; PMCID: PMC9099179.
- 714 26. Nowell LS, Norris JM, White DE, Moules NJ. Thematic analysis: Striving to Meet the  
715 Trustworthiness Criteria. *International Journal of Qualitative Methods* [Internet]. 2017 Oct  
716 2;16(1):1–13. Available from:  
717 <https://journals.sagepub.com/doi/10.1177/1609406917733847>
- 718 27. O'Brien BC, Harris IB, Beckman TJ, Reed DA, Cook DA. Standards for reporting  
719 qualitative research: a synthesis of recommendations. *Acad Med*. 2014;89: 1245–1251.  
720 [pmid:24979285](https://pubmed.ncbi.nlm.nih.gov/24979285/)
- 721 28. Petz KD, Toner ER, Rucker M, Leventhal EL, Livermon S, Davidson B, Boukhechba M,  
722 Barnes LE, Teachman BA. Examining state cognitive and affective outcomes following  
723 brief mobile phone-based training sessions to reduce anxious interpretations [Internet].  
724 OSF; 2023. Available from: [osf.io/jg4vu](https://osf.io/jg4vu)



- 725 29. Toner ER, Livermon S, Petz KD, Leventhal E, Rucker M, Davidson B, et al. Hoos Think  
726 Calmly: Evaluating the effect of personalized micro-sessions of cognitive bias  
727 modification on mental health outcomes [Internet]. OSF; 2024. Available from:  
728 [osf.io/zx6tg](https://osf.io/zx6tg)
- 729 30. Roberts K, Dowell A, Nie JB. Attempting Rigour and Replicability in Thematic Analysis of  
730 Qualitative Research data; a Case Study of Codebook Development. BMC Medical  
731 Research Methodology [Internet]. 2019 Mar 28;19(1):1–8.
- 732 31. Braun V, Clarke V. Using Thematic Analysis in Psychology. Qualitative Research in  
733 Psychology. 2006;3(2):77–101.
- 734 32. Descript [Internet]. [cited 2024 Jul 17]. Available from: <https://www.descript.com/>
- 735 33. DeCuir-Gunby JT, Marshall PL, McCulloch AW. Developing and Using a Codebook for  
736 the Analysis of Interview Data: An Example from a Professional Development Research  
737 Project. Field Methods. 2010 Dec 27;23(2):136–55.
- 738 34. Delve Tool [Internet]. [cited 2024 Jul 17]. Available from: <https://delvetool.com/>
- 739 35. Hayes AF, Krippendorff K. Answering the Call for a Standard Reliability Measure for  
740 Coding Data. Communication Methods and Measures. 2007 Apr;1(1):77–89.
- 741 36. O'Connor C, Joffe H. Intercoder reliability in qualitative research: Debates and practical  
742 guidelines. International Journal of Qualitative Methods. 2020 Jan 1;19(1).
- 743 37. Livermon S. A Mobile Intervention to Reduce Anxiety Among University Students,  
744 Faculty, and Staff: Mixed Methods Study on Users' Experiences [Internet]. OSF; 2024.  
745 Available from: [osf.io/w8jzg](https://osf.io/w8jzg)
- 746 38. Fusch PI, Ness LR. Are We There Yet? Data Saturation in Qualitative Research  
747 [Internet]. NSUWorks. 2015. Available from: <https://nsuworks.nova.edu/tqr/vol20/iss9/3/>
- 748 39. Liverpool S, Mota CP, Sales CMD, Čuš A, Carletto S, Hancheva C, et al. Engaging  
749 Children and Young People in Digital Mental Health Interventions: Systematic Review of

- 750 Modes of Delivery, Facilitators, and Barriers. *Journal of Medical Internet Research*. 2020  
751 Jun 23;22(6):1–17.
- 752 40. Berry N, Lobban F, Bucci S. A qualitative exploration of service user views about using  
753 digital health interventions for self-management in severe mental health problems. *BMC*  
754 *Psychiatry*. 2019 Jan 21;19(1):35. doi: 10.1186/s12888-018-1979-1. PMID: 30665384;  
755 PMID: PMC6341527.
- 756 41. Bakker D, Kazantzis N, Rickwood D, Rickard N. Mental Health Smartphone Apps:  
757 Review and Evidence-Based Recommendations for Future Developments. *JMIR Mental*  
758 *Health [Internet]*. 2016 Mar 1;3(1):e7. Available from:  
759 <https://www.ncbi.nlm.nih.gov/pmc/articles/PMC4795320/>
- 760 42. Venning A, Herd MC, Oswald TK, Razmi S, Glover F, Hawke T, et al. Exploring the  
761 acceptability of a digital mental health platform incorporating a virtual coach: The good,  
762 the bad, and the opportunities. *Health Informatics Journal*. 2021  
763 Jan;27(1):146045822199487.
- 764 43. Balaskas A, Schueller SM, Cox AL, Doherty G. Understanding users' perspectives on  
765 mobile apps for anxiety management. *Front. Digit. Health*. 2022;4:854263.
- 766 44. Bidargaddi N, Almirall D, Murphy S, Nahum-Shani I, Kovalcik M, Pituch T, et al. To  
767 Prompt or Not to Prompt? A Microrandomized Trial of Time-Varying Push Notifications to  
768 Increase Proximal Engagement With a Mobile Health App. *JMIR mHealth and uHealth*.  
769 2018 Nov 29;6(11):e10123.
- 770 45. Burchert S, Alkneime MS, Bird M, Carswell K, Cuijpers P, Hansen P, et al. User-  
771 Centered App Adaptation of a Low-Intensity E-Mental Health Intervention for Syrian  
772 Refugees. *Front. Psychiatry*. 2019;9:663.
- 773 46. Porche MV, Folk JB, Tolou-Shams M, Fortuna LR. Researchers' Perspectives on Digital  
774 Mental Health Intervention Co-Design With Marginalized Community Stakeholder Youth  
775 and Families. *Front. Psychiatry*. 2022;13:867460.

776 **Supporting Information**

777 **S1 Figure. Thematic Maps** (initial and revised to only include the most saturated codes).

778 **S1 Text. Standards for Reporting Qualitative Research (SRQR) Checklist.**

779 **S2 Text. Semi-structured Interview Guide.**
